# Supplementary material for: Benzene Uptake in Hookah Smokers and Non-smokers Attending Hookah Social Events: Regulatory Implications
Source: Oxford University Press journal article supplement (doi:10.1158/1055-9965.epi-14-0576), 2014-11-21
Supplement: 10559965epi140576-sup-131998_1_supp_2601256_n9y71q.docx [file 10559965epi140576-sup-131998_1_supp_2601256_n9y71q.docx]

**Supplementary Data**

**Note:** Supplementary data for this article are available at Cancer Epidemiology, Biomarkers & Prevention Online (http://cebp.aacrjournals.org/).

**Creatinine assay from urine samples**

To a 2 mL microcentrifuge tube, add 20 uL of a thoroughly thawed and mixed urine sample, 20 uL of a 1.44mg/uL creatinine-d3 internal standard and 160 uL of 0.1% (v/v) heptafluorobutanoic acid in water. After mixing, the solution is transferred to a prewashed solid phase column (Isolute part 290-0010-A, International Sorbent Technology). The columns are washed with 200 uL 5% methanol: 95% water solution, and then eluted into autosampler vials with 400 uL methanol. After adding 100 uL 25 mM pH 5 acetate buffer, the vials are capped for analysis. Samples are analyzed by isotope dilution ESI- LC-MS/MS (Finnigan Quantum LC-MS/MS, Thermo Scientific Corp.) using ion transitions 114-> 44 and 117-47 and 114-> 86 and 117-> 89 for quantifying and qualifying ions, respectively.
